# Supplementary material for: Graphene-edge dielectrophoretic tweezers for trapping of biomolecules
Source: PubMed Central journal article supplement (PMC5709377; doi:10.1038/s41467-017-01635-9), 2017-11-30
Supplement: 41467_2017_1635_MOESM2_ESM.pdf [file 41467_2017_1635_MOESM2_ESM.pdf]

## **Description of Additional Supplementary Files**

File Name: Supplementary Movie 1

Description: Graphene-edge dielectrophoretic tweezers for manipulation of polystyrene beads (190 nm diameter).

File Name: Supplementary Movie 2

Description: Frequency dependence of graphene-edge DNA localization using 10 kbp DNA at 10 pM concentration (4x real time).
